# Supplementary material for: Male-lineage transmission of an acquired metabolic phenotype induced by grand-paternal obesity
Source: PubMed Central journal article supplement — Mol Metab. 2016 Jun 23;5(8):699–708. doi: 10.1016/j.molmet.2016.06.008 (PMC5021672; doi:10.1016/j.molmet.2016.06.008), 2016-06-23
Supplement: mmc1.pdf [file mmc1.pdf]

**Supplementary Table 1: Breeding statistics**

| <b>Offspring Group</b> | <b>Sire genotype</b>    | <b>Dam genotype</b> | <b>Number of sires</b> | <b>Number of litters</b> | <b>Average litter size<br/>± SEM</b> | <b>Average sire age at birth<br/>± SEM (d)</b> | <b>Average sire weight<br/>± SEM (g)<sup>a</sup></b> |
|------------------------|-------------------------|---------------------|------------------------|--------------------------|--------------------------------------|------------------------------------------------|------------------------------------------------------|
| Control                | <i>a/a</i>              | <i>a/a</i>          | 15                     | 23                       | 6.8 ± 0.4                            | 123 ± 9                                        | 31.1 ± 0.9                                           |
| PatObF1                | <i>A<sup>vy</sup>/a</i> | <i>a/a</i>          | 8                      | 12                       | 7.4 ± 1.1                            | 126 ± 11                                       | 48.6 ± 1.2***                                        |
| PatObF2                | <i>a/a</i>              | <i>a/a</i>          | 6                      | 15                       | 6.9 ± 0.6                            | 121 ± 12                                       | 33.5 ± 1.3                                           |
| PatObF3                | <i>a/a</i>              | <i>a/a</i>          | 13                     | 20                       | 6.3 ± 0.5                            | 105 ± 8                                        | 31.9 ± 0.8                                           |

<sup>a</sup> sire weight at 7dpp

\*\*\*  $p < 0.0001$  v Control
