# Supplementary material for: Male-lineage transmission of an acquired metabolic phenotype induced by grand-paternal obesity
Source: PubMed Central journal article supplement — Mol Metab. 2016 Jun 23;5(8):699–708. doi: 10.1016/j.molmet.2016.06.008 (PMC5021672; doi:10.1016/j.molmet.2016.06.008), 2016-06-23
Supplement: mmc2.pdf [file mmc2.pdf]

**Supplementary Table 2: Diets used in this study**

|                                                   | <b>Western diet<br/>(SF00-219)</b> | <b>Control diet<br/>(SF04-057)</b> |
|---------------------------------------------------|------------------------------------|------------------------------------|
| Protein                                           | 19.0%                              | 19.0%                              |
| Total Fat                                         | 21.0%                              | 6.0%                               |
| Crude Fibre                                       | 4.7%                               | 4.7%                               |
| AD Fibre                                          | 4.7%                               | 4.7%                               |
| Digestible Energy                                 | 19.4 MJ/Kg                         | 16.1 MJ/Kg                         |
| % Total calculated digestible energy from lipids  | 40.0%                              | 14.0%                              |
| % Total calculated digestible energy from protein | 17.0%                              | 21.0%                              |
| <b>Ingredients</b>                                |                                    |                                    |
| Casein (Acid)                                     | 195 g/Kg                           | 195 g/Kg                           |
| Sucrose                                           | 341 g/Kg                           | 341 g/Kg                           |
| Canola Oil                                        | nil                                | 60 g/Kg                            |
| Clarified Butter (Ghee)                           | 210 g/Kg                           | nil                                |
| Cellulose                                         | 50 g/Kg                            | 50 g/Kg                            |
| Wheat Starch                                      | 154 g/Kg                           | 306 g/Kg                           |
| DL Methionine                                     | 3.0 g/Kg                           | 3.0 g/Kg                           |
| Calcium Carbonate                                 | 17.1 g/Kg                          | 17.1 g/Kg                          |
| Sodium Chloride                                   | 2.6 g/Kg                           | 2.6 g/Kg                           |
| AIN93 Trace Minerals                              | 1.4 g/Kg                           | 1.4 g/Kg                           |
| Potassium Citrate                                 | 2.6 g/Kg                           | 2.5 g/Kg                           |
| Potassium Dihydrogen Phosphate                    | 6.9 g/Kg                           | 6.9 g/Kg                           |
| Potassium Sulphate                                | 1.6 g/Kg                           | 1.6 g/Kg                           |
| Choline Chloride (75%)                            | 2.5 g/Kg                           | 2.5 g/Kg                           |
| SF00-219 Vitamins                                 | 10 g/Kg                            | 10 g/Kg                            |
| Cholesterol                                       | 1.5 g/Kg                           | 1.5 g/Kg                           |
| Oxicap E2                                         | 0.04 g/Kg                          | 0.04 g/Kg                          |
