# Supplementary material for: Male-lineage transmission of an acquired metabolic phenotype induced by grand-paternal obesity
Source: PubMed Central journal article supplement — Mol Metab. 2016 Jun 23;5(8):699–708. doi: 10.1016/j.molmet.2016.06.008 (PMC5021672; doi:10.1016/j.molmet.2016.06.008), 2016-06-23
Supplement: mmc4.pdf [file mmc4.pdf]

**Supplementary Table 4: Genes targeted by tRF-GluCTC or miR-10 downregulated<sup>a</sup> in the murine MZT**

| Entrez_ID | Gene    | GluCTC target | mir-10 target | log <sub>2</sub> (fold-change) 4C vs Oocyte <sup>b</sup> |
|-----------|---------|---------------|---------------|----------------------------------------------------------|
| 13839     | Epha5   |               | Yes           | -7.4                                                     |
| 229011    | Samd10  | Yes           |               | -5.3                                                     |
| 12014     | Bach2   |               | Yes           | -5.1                                                     |
| 16591     | Kl      |               | Yes           | -5.0                                                     |
| 69727     | Usp46   |               | Yes           | -5.0                                                     |
| 244310    | Dlgap2  |               | Yes           | -4.9                                                     |
| 244654    | Mtss11  |               | Yes           | -4.5                                                     |
| 239099    | Homez   |               | Yes           | -4.5                                                     |
| 27386     | Npas3   |               | Yes           | -4.4                                                     |
| 208439    | Klhl29  |               | Yes           | -4.4                                                     |
| 83922     | Tsga14  | Yes           |               | -4.1                                                     |
| 72333     | Palld   | Yes           |               | -4.1                                                     |
| 19013     | Ppara   |               | Yes           | -4.0                                                     |
| 11519     | Add2    | Yes           |               | -4.0                                                     |
| 64898     | Lpin2   | Yes           |               | -4.0                                                     |
| 58887     | Repin1  | Yes           |               | -3.9                                                     |
| 13358     | Slc25a1 |               | Yes           | -3.9                                                     |
| 319924    | Apba1   | Yes           |               | -3.8                                                     |
| 19684     | Rdx     | Yes           |               | -3.8                                                     |
| 22781     | Ikzf4   | Yes           |               | -3.8                                                     |
| 19883     | Rora    |               | Yes           | -3.8                                                     |
| 241656    | Pak7    | Yes           |               | -3.7                                                     |
| 13592     | Ebf2    |               | Yes           | -3.7                                                     |
| 11735     | Ank3    |               | Yes           | -3.7                                                     |
| 217335    | Fbf1    |               | Yes           | -3.6                                                     |
| 14768     | Lanc11  |               | Yes           | -3.5                                                     |
| 14007     | Celf2   |               | Yes           | -3.5                                                     |
| 72844     | Kctd17  |               | Yes           | -3.5                                                     |
| 11785     | Apbb1   | Yes           |               | -3.4                                                     |
| 22626     | Slc23a3 |               | Yes           | -3.3                                                     |
| 21388     | Tbx5    |               | Yes           | -3.3                                                     |
| 242481    | Palm2   |               | Yes           | -3.3                                                     |
| 217124    | Ppp1r9b | Yes           |               | -3.3                                                     |
| 26381     | Esrrg   |               | Yes           | -3.3                                                     |
| 208869    | Dock3   | Yes           |               | -3.2                                                     |

|        |          |     |     |      |
|--------|----------|-----|-----|------|
| 432530 | Adcy1    | Yes |     | -3.1 |
| 109205 | Sobp     |     | Yes | -3.1 |
| 433926 | Lrrc8b   |     | Yes | -3.1 |
| 54338  | Slc23a2  | Yes |     | -3.1 |
| 14254  | Flt1     |     | Yes | -3.0 |
| 52588  | Tspan14  | Yes |     | -3.0 |
| 170826 | Ppargc1b |     | Yes | -3.0 |
| 225743 | Rnf165   |     | Yes | -2.9 |
| 110279 | Bcr      |     | Yes | -2.9 |
| 99003  | Qser1    | Yes |     | -2.9 |
| 331474 | Rgag4    | Yes |     | -2.8 |
| 228790 | Asx11    | Yes |     | -2.8 |
| 15118  | Has3     |     | Yes | -2.8 |
| 18028  | Nfib     | Yes |     | -2.8 |
| 52428  | Rhpn2    |     | Yes | -2.7 |
| 71816  | Rnf180   |     | Yes | -2.7 |
| 54525  | Syt7     | Yes |     | -2.7 |
| 270201 | Klhl18   | Yes |     | -2.7 |
| 15571  | Elavl3   |     | Yes | -2.7 |
| 18645  | Pfn2     | Yes |     | -2.7 |
| 208151 | Tmem132b |     | Yes | -2.6 |
| 214459 | Fnbp11   |     | Yes | -2.6 |
| 12325  | Camk2g   |     | Yes | -2.6 |
| 68737  | Angel1   | Yes |     | -2.6 |
| 76273  | Ndfip2   |     | Yes | -2.5 |
| 13544  | Dvl3     |     | Yes | -2.5 |
| 627214 | Fam196a  |     | Yes | -2.5 |
| 69274  | Ctdspl   |     | Yes | -2.4 |
| 15569  | Elavl2   |     | Yes | -2.4 |
| 234353 | Psd3     | Yes |     | -2.3 |
| 29867  | Cabp1    | Yes |     | -2.3 |
| 16594  | Klc2     |     | Yes | -2.3 |
| 19058  | Ppp3r1   | Yes |     | -2.2 |
| 75788  | Smurf1   |     | Yes | -2.2 |
| 94109  | Csmd1    |     | Yes | -2.2 |
| 20969  | Sdc1     |     | Yes | -2.2 |
| 213988 | Tnrc6b   |     | Yes | -2.1 |
| 116838 | Rims2    |     | Yes | -2.1 |
| 238988 | Erc2     | Yes |     | -2.0 |
| 74126  | Syvn1    | Yes |     | -2.0 |
| 12053  | Bcl6     |     | Yes | -2.0 |

|        |          |     |     |      |
|--------|----------|-----|-----|------|
| 17257  | Mecp2    | Yes |     | -2.0 |
| 338365 | Slc41a2  |     | Yes | -2.0 |
| 268980 | Strn     |     | Yes | -2.0 |
| 81489  | Dnajb1   | Yes |     | -1.9 |
| 14270  | Srgap2   | Yes |     | -1.8 |
| 12570  | Cdk5r2   | Yes |     | -1.8 |
| 18032  | Nfix     |     | Yes | -1.7 |
| 69288  | Rhobtb1  | Yes |     | -1.7 |
| 242443 | Grin3a   |     | Yes | -1.7 |
| 276952 | Rasl10b  | Yes |     | -1.6 |
| 75974  | Dock11   |     | Yes | -1.6 |
| 21844  | Tiam1    |     | Yes | -1.6 |
| 18569  | Pdcd4    | Yes |     | -1.5 |
| 231991 | Creb5    | Yes |     | -1.5 |
| 71865  | Fbxo30   |     | Yes | -1.5 |
| 330222 | Sdk1     |     | Yes | -1.5 |
| 76895  | Bicd2    |     | Yes | -1.3 |
| 320772 | Mdga2    |     | Yes | -1.3 |
| 17126  | Smad2    |     | Yes | -1.3 |
| 18141  | Nup50    |     | Yes | -1.3 |
| 269682 | Golga3   |     | Yes | -1.3 |
| 101488 | Slco2b1  | Yes |     | -1.2 |
| 12728  | Clcn5    |     | Yes | -1.2 |
| 12125  | Bcl2l11  |     | Yes | -1.2 |
| 76686  | Clip3    | Yes |     | -1.2 |
| 23879  | Fxr2     | Yes | Yes | -1.2 |
| 217866 | Cdc42bpb | Yes |     | -1.1 |
| 26403  | Map3k11  | Yes |     | -1.1 |
| 194655 | Klf11    |     | Yes | -1.1 |
| 20807  | Srf      | Yes |     | -1.1 |
| 212391 | Lcor     |     | Yes | -1.1 |
| 12703  | Socs1    | Yes |     | -1.1 |
| 26390  | Mapkbp1  |     | Yes | -1.0 |
| 12361  | Cask     |     | Yes | -1.0 |

---

<sup>a</sup>  $\log_2(\text{fold-change}) \leq -1$

<sup>b</sup> Park, S. J., Shirahige, K., Ohsugi, M. & Nakai, K. DBTMEE: a database of transcriptome in mouse early embryos. Nucleic Acids Res (2014).
