# Supplementary material for: Male-lineage transmission of an acquired metabolic phenotype induced by grand-paternal obesity
Source: PubMed Central journal article supplement — Mol Metab. 2016 Jun 23;5(8):699–708. doi: 10.1016/j.molmet.2016.06.008 (PMC5021672; doi:10.1016/j.molmet.2016.06.008), 2016-06-23
Supplement: mmc5.pdf [file mmc5.pdf]

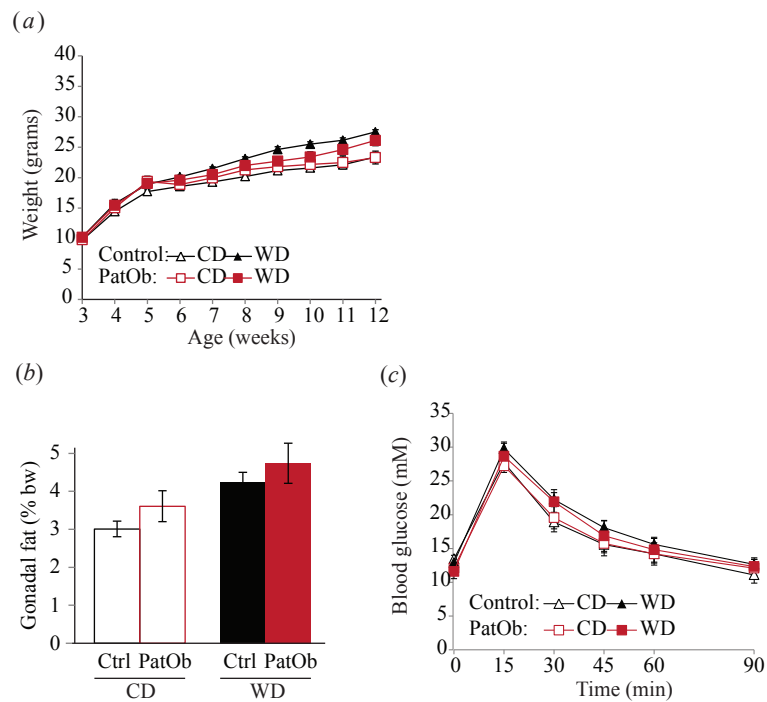

**Supplementary Figure 1. Female F1 offspring of obese sires are not sensitised to the effects of a Western diet. (A)** Post-weaning weight trajectories of female offspring of obese sires (PatOb) or lean sires (Control), fed either Control diet (CD) or a Western diet (WD) (Control,  $n = 19-20$ ; PatOb,  $n = 7$ ). **(B)** Gonadal fat weight for female offspring at 12 weeks as in A. **(C)** Glucose tolerance test at six weeks of age for F1 females, (Control,  $n=16-19$ ; PatOb,  $n = 7$ ).
