# Supplementary material for: Male-lineage transmission of an acquired metabolic phenotype induced by grand-paternal obesity
Source: PubMed Central journal article supplement — Mol Metab. 2016 Jun 23;5(8):699–708. doi: 10.1016/j.molmet.2016.06.008 (PMC5021672; doi:10.1016/j.molmet.2016.06.008), 2016-06-23
Supplement: mmc6.pdf [file mmc6.pdf]

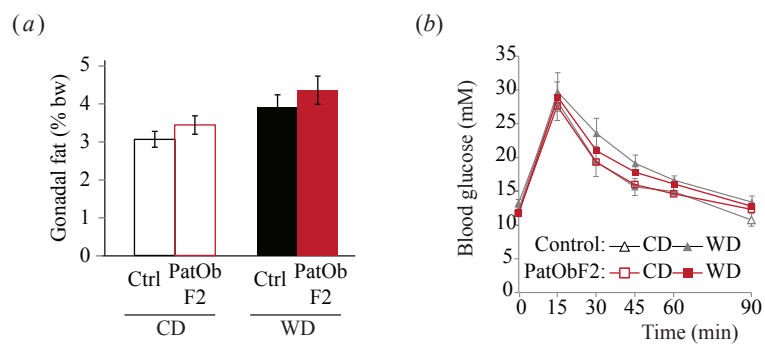

**Supplementary Figure 2. Female F2 offspring of obese sires are not sensitised to the effects of a Western diet. (A)** Gonadal fat weight of female F2 offspring of obese sires (PatObF2) or lean sires (Control), fed either Control diet (CD) or a Western diet (WD) (Control,  $n = 19-20$ ; PatOb,  $n = 6-7$ ). **(B)** Glucose tolerance test at six weeks of age for F1 females shown in A.
